# Supplementary material
Source: PubMed Central journal article supplement (PMC384717)

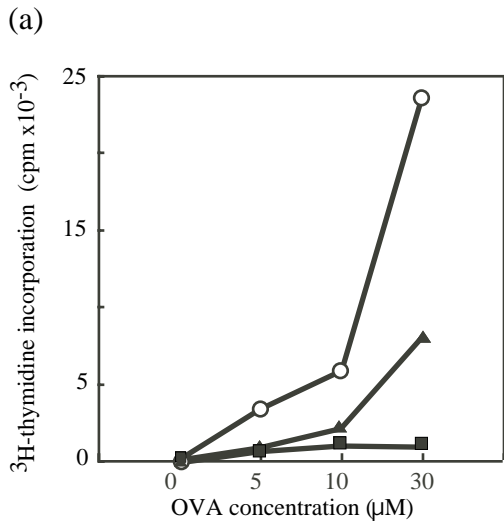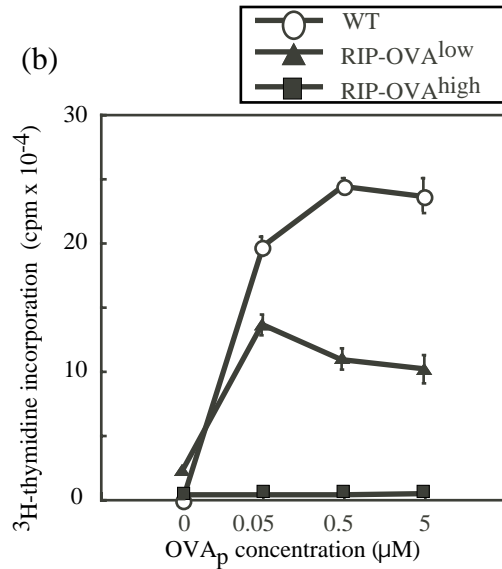

Supplement: pnas_101_12_4192__2.pdf [file pnas_101_12_4192__2.pdf]

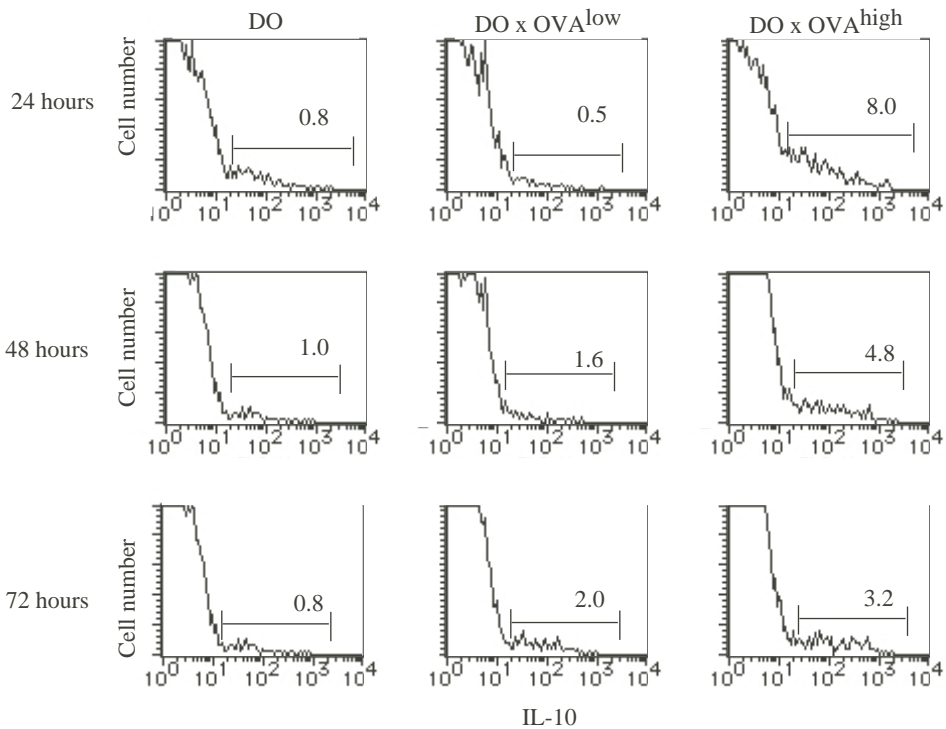

IL-10

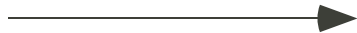

Supplement: pnas_101_12_4192__4.pdf [file pnas_101_12_4192__4.pdf]
